# Supplementary material for: Base-resistant adsorbents prepared using diamino group-grafted mesoporous silica uniformly coated with zirconia
Source: Royal Society of Chemistry journal article supplement (doi:10.1039/c7ta08328a), 2017-01-01
Supplement: c7ta08328a1.pdf [file c7ta08328a1.pdf]

## Supplementary information

### Base-resistant absorbents prepared using diamino group-grafted mesoporous silica uniformly coated with zirconia

Masaki Okamoto,<sup>a</sup> Haruka Satake<sup>a</sup> and Hiroyuki Seki<sup>b</sup>

<sup>a</sup>*Department of Chemical Science and Engineering, Tokyo Institute of Technology, Ookayama, Meguro-ku, Tokyo 152-8552, Japan.*

<sup>b</sup>*Central Technical Research Laboratory, JXTG Nippon Oil & Energy Co., Chidori-cho, Naka-ku, Yokohama-shi, Kanagawa 231-0815, Japan.*

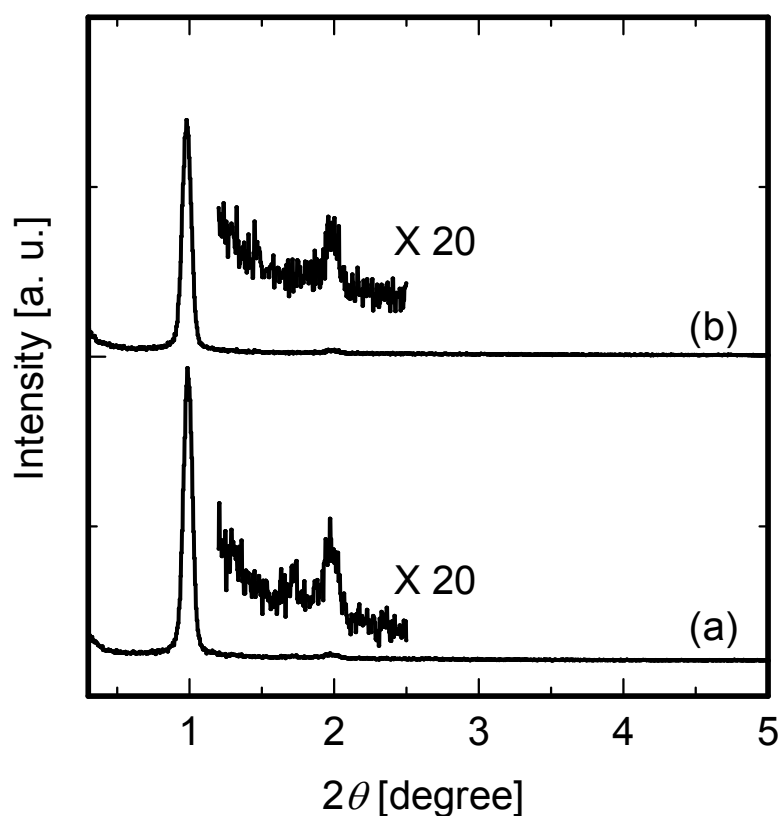

**Fig. S1** SAXS patterns of (a) MS-7 and (b) MS-7/Zr(1).

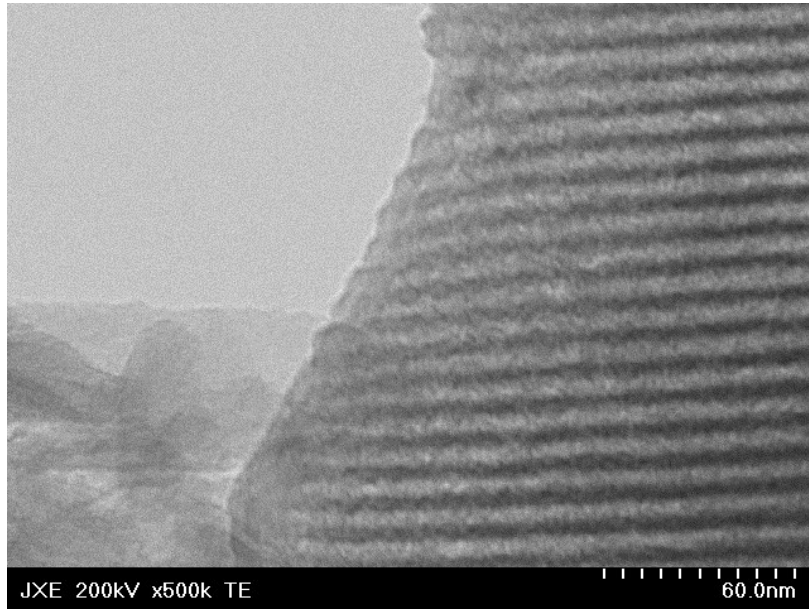

**Fig. S2** STEM image of MS-10 that had been coated with zirconia layers five times.

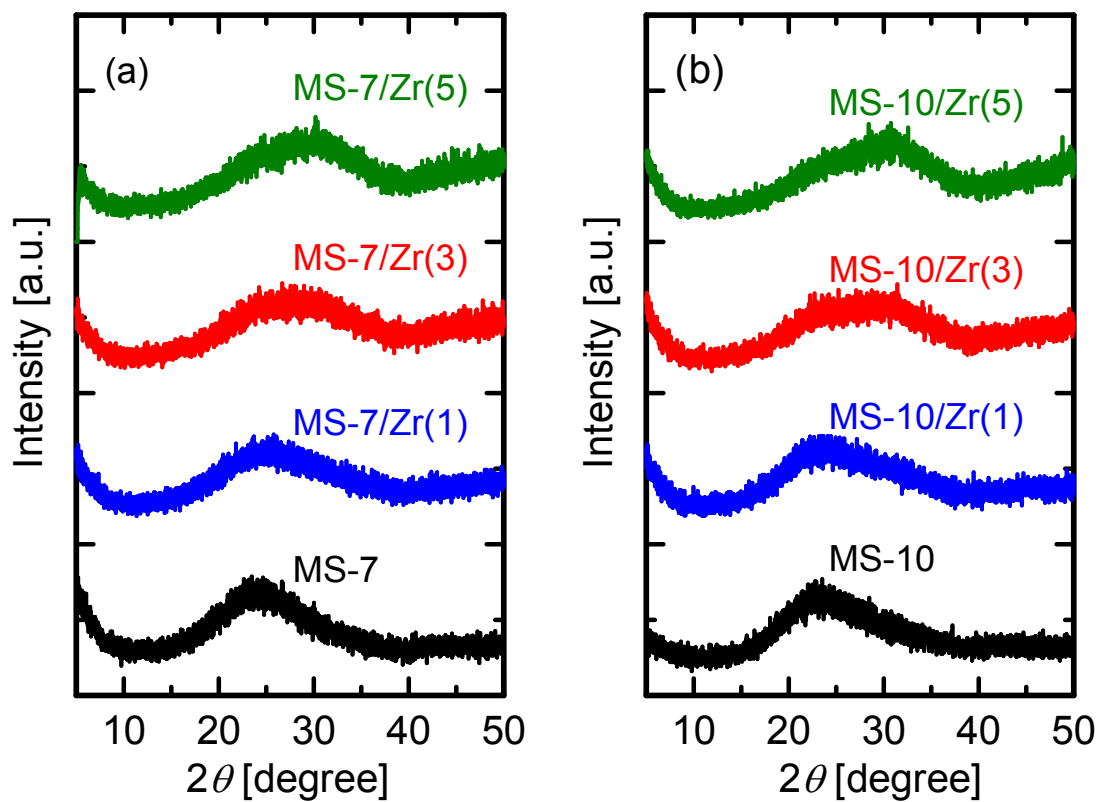

**Fig. S3** XRD patterns of (a) MS-7 and (b) MS-10 coated with zirconia layers up to five times.

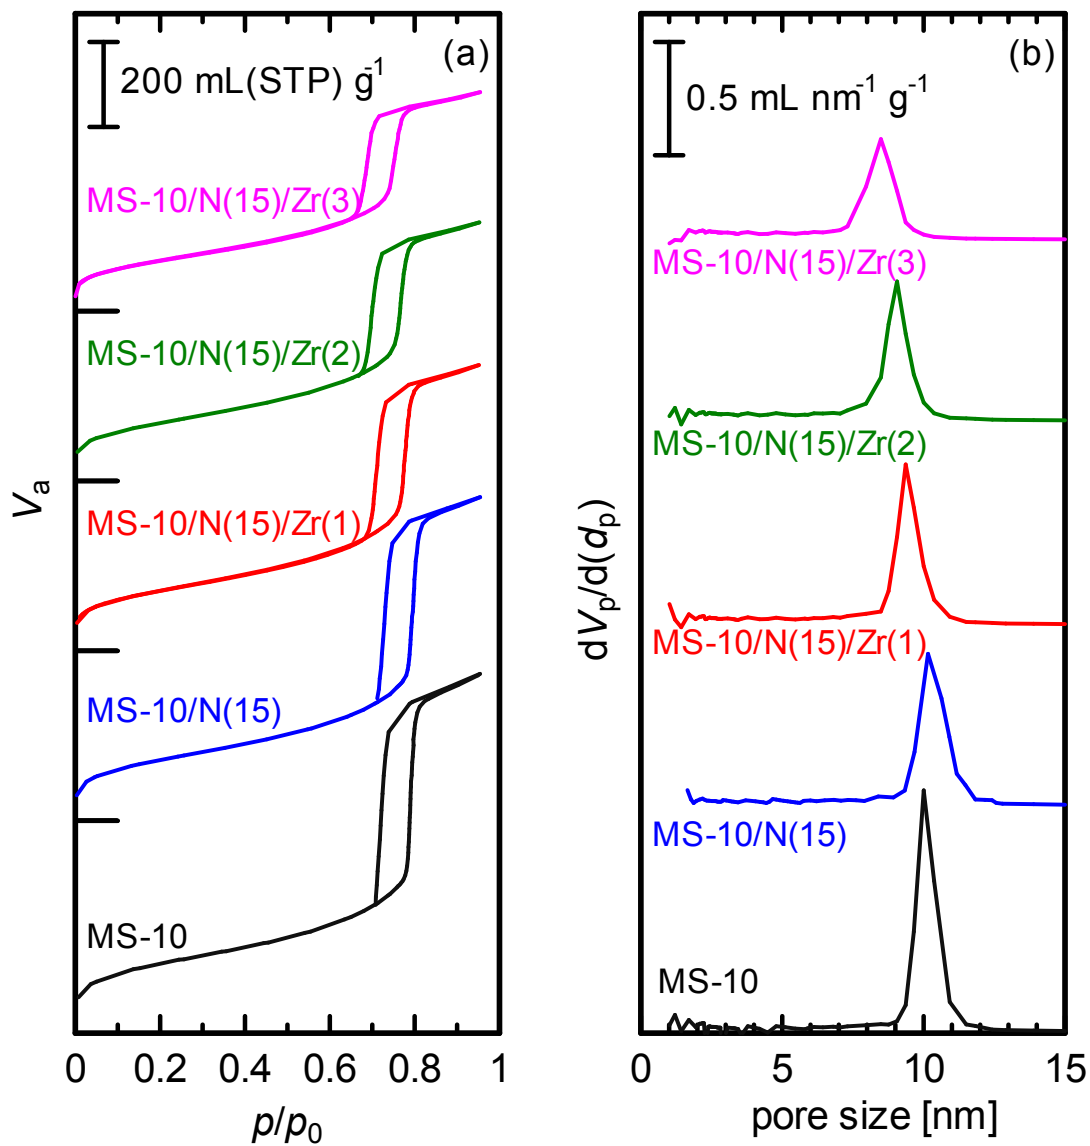

**Fig. S4** (a) Nitrogen adsorption–desorption isotherms and (b) pore size distribution of diamino group-grafted MS-10 (diaminosilane/silanol = 15%) coated with zirconia layers up to three times.

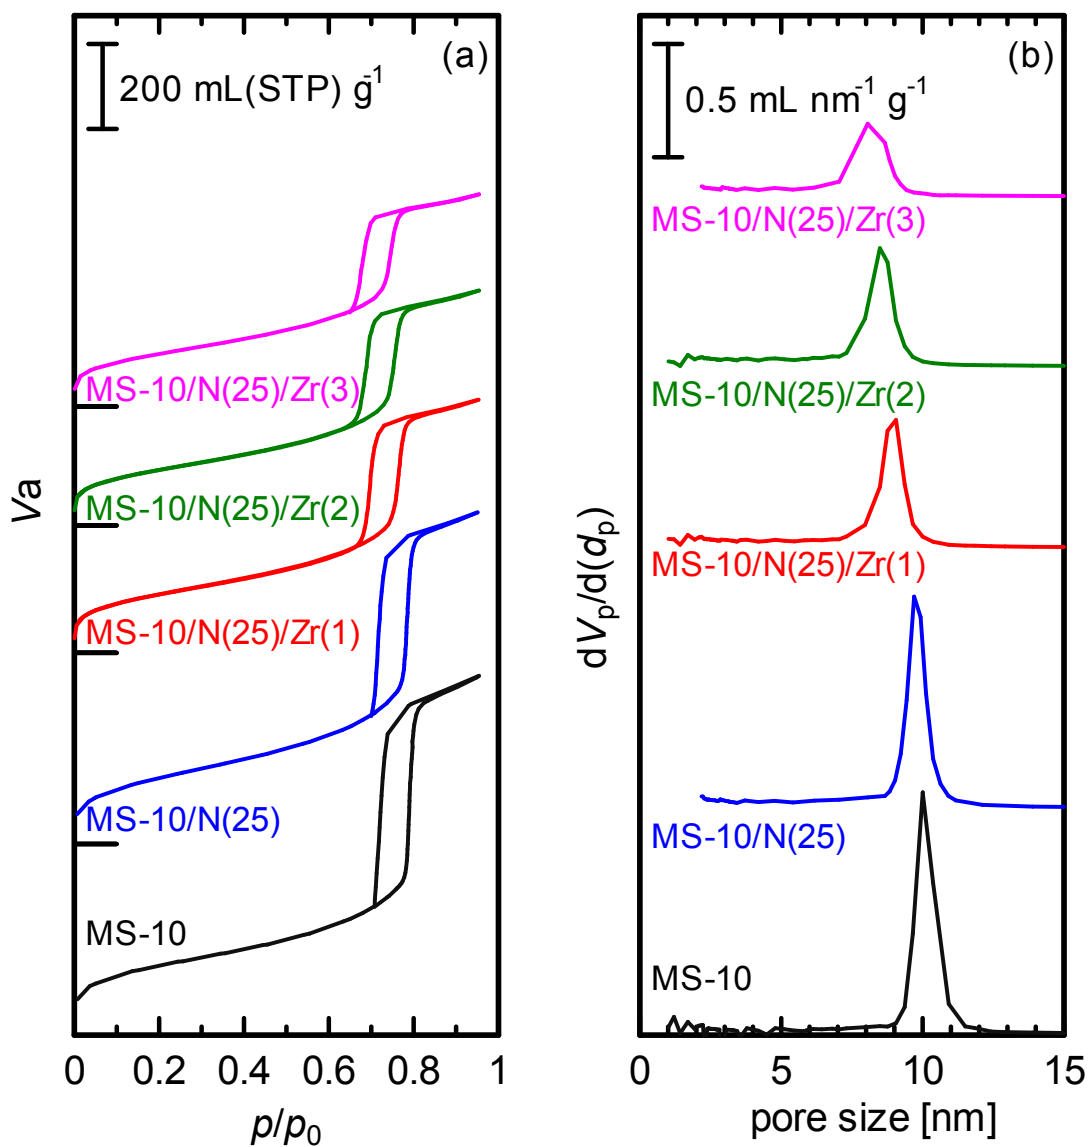

**Fig. S5** (a) Nitrogen adsorption–desorption isotherms and (b) pore size distribution of diamino group-grafted MS-10 (diaminosilane/silanol = 25%) coated with zirconia layers up to three times.

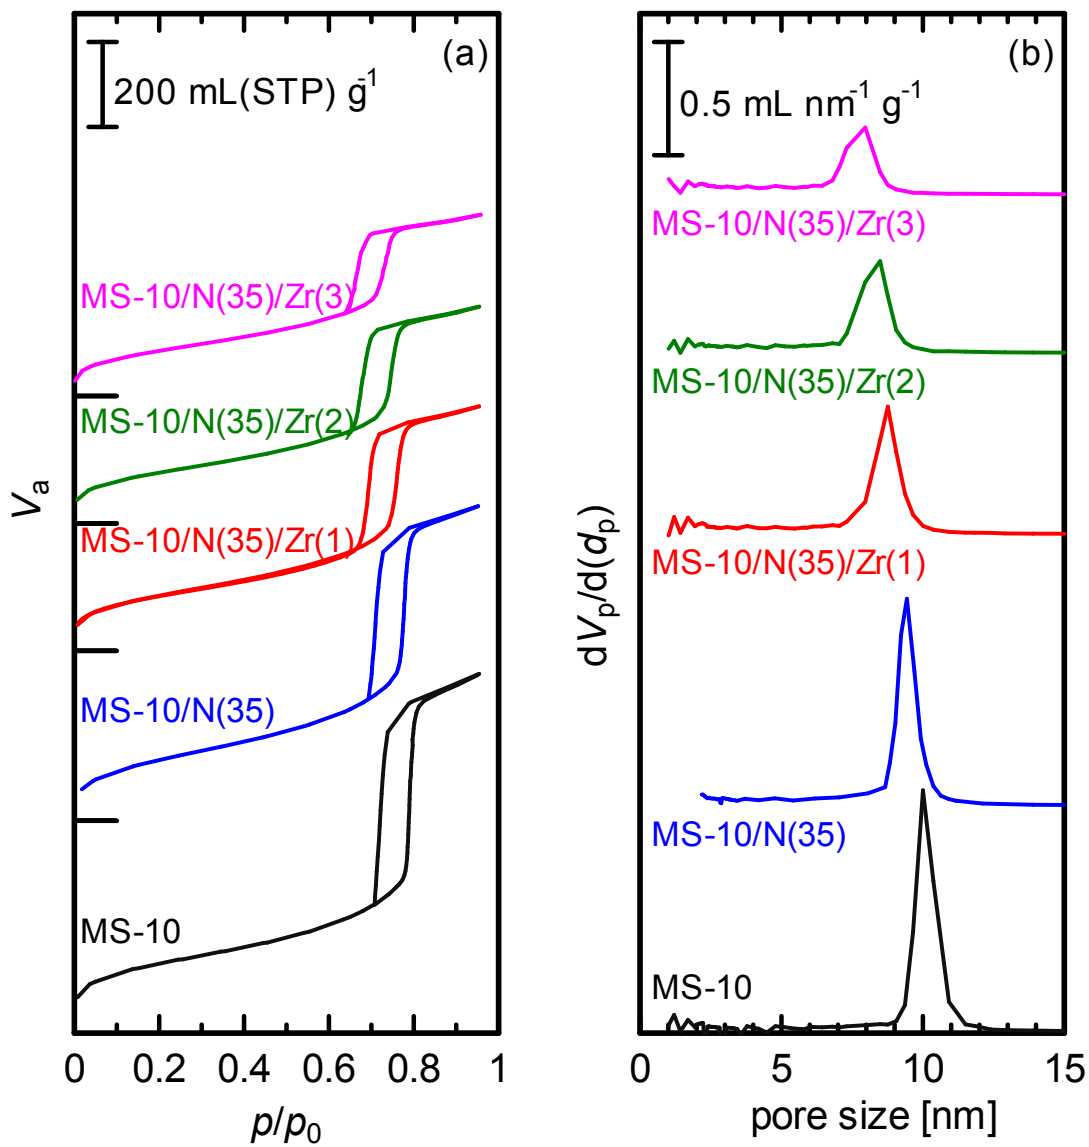

**Fig. S6** (a) Nitrogen adsorption–desorption isotherms and (b) pore size distribution of diamino group-grafted MS-10 (diaminosilane/silanol = 35%) coated with zirconia layers up to three times.

**Table S1** Porosities and elemental analysis of zirconia-coated MS-7 and MS-10

| Sample      | Zr/Si (mol/mol) | Specific surface area <sup>a</sup><br>/m <sup>2</sup> g <sup>-1</sup> | Pore volume <sup>a</sup><br>/mL g <sup>-1</sup> | Pore size<br>/nm |
|-------------|-----------------|-----------------------------------------------------------------------|-------------------------------------------------|------------------|
| MS-7        | -               | 1044                                                                  | 1.1                                             | 7.0              |
| MS-7/Zr(1)  | 0.096           | 857                                                                   | 0.92                                            | 6.5              |
| MS-7/Zr(2)  | 0.16            | 797                                                                   | 0.87                                            | 6.2              |
| MS-7/Zr(3)  | 0.21            | 790                                                                   | 0.84                                            | 6.0              |
| MS-7/Zr(4)  | 0.29            | 764                                                                   | 0.82                                            | 5.8              |
| MS-7/Zr(5)  | 0.31            | 613                                                                   | 0.68                                            | 5.5              |
| MS-10       | -               | 546                                                                   | 1.24                                            | 10.5             |
| MS-10/Zr(1) | 0.081           | 528                                                                   | 1.18                                            | 10.5             |
| MS-10/Zr(2) | 0.14            | 564                                                                   | 1.21                                            | 10.0             |
| MS-10/Zr(3) | 0.21            | 586                                                                   | 1.19                                            | 9.5              |
| MS-10/Zr(4) | 0.26            | 549                                                                   | 1.10                                            | 8.9              |
| MS-10/Zr(5) | 0.32            | 531                                                                   | 1.10                                            | 8.3              |

<sup>a</sup> per silica weight

**Table S2** Porosities and elemental analysis of diamino group-grafted mesoporous silica coated with zirconia

| Sample            | Amount of<br>diamino group <sup>a</sup><br>/mol g <sup>-1</sup> | Zr/Si<br>(mol/mol) | Specific<br>surface area <sup>a</sup><br>/m <sup>2</sup> g <sup>-1</sup> | Pore volume <sup>a</sup><br>/mL g <sup>-1</sup> | Pore size<br>/nm |
|-------------------|-----------------------------------------------------------------|--------------------|--------------------------------------------------------------------------|-------------------------------------------------|------------------|
| MS-10             | -                                                               | -                  | 605                                                                      | 1.3                                             | 10               |
| MS-10/N(15)       | 0.12                                                            | -                  | 523                                                                      | 1.2                                             | 10               |
| MS-10/N(15)/Zr(1) | 0.12                                                            | 0.060              | 516                                                                      | 1.0                                             | 9.4              |
| MS-10/N(15)/Zr(2) | 0.12                                                            | 0.11               | 494                                                                      | 0.94                                            | 9.1              |
| MS-10/N(15)/Zr(3) | 0.12                                                            | 0.15               | 432                                                                      | 0.80                                            | 8.5              |
| MS-10/N(25)       | 0.34                                                            | -                  | 571                                                                      | 1.2                                             | 9.7              |
| MS-10/N(25)/Zr(1) | 0.34                                                            | 0.078              | 501                                                                      | 0.92                                            | 9.1              |
| MS-10/N(25)/Zr(2) | 0.34                                                            | 0.11               | 474                                                                      | 0.86                                            | 8.5              |
| MS-10/N(25)/Zr(3) | 0.34                                                            | 0.15               | 449                                                                      | 0.77                                            | 8.1              |
| MS-10/N(35)       | 0.59                                                            | -                  | 531                                                                      | 1.1                                             | 9.4              |
| MS-10/N(35)/Zr(1) | 0.59                                                            | 0.055              | 476                                                                      | 0.89                                            | 8.8              |
| MS-10/N(35)/Zr(2) | 0.59                                                            | 0.091              | 437                                                                      | 0.79                                            | 8.5              |
| MS-10/N(35)/Zr(3) | 0.59                                                            | 0.13               | 387                                                                      | 0.66                                            | 8.0              |

<sup>a</sup> per silica weight
